# Supplementary material for: A secretory hexokinase plays an active role in the proliferation of Nosema bombycis
Source: PeerJ. 2018 Sep 21;6:e5658. doi: 10.7717/peerj.5658 (PMC6152459; doi:10.7717/peerj.5658)
Supplement: Table S3 — Real-time quantitative PCR raw data of HK transcriptional level in experimental and mock groups. which include Cq of target and reference gene. HK was target gene. The number behind the “HK” and ”EGFP” means d. p. i. EGFP was the mock group. [file peerj-06-5658-s009.xlsx]

## Sheet: Sheet1
Color	Replicate Group	Sample Name	Gene Name	Condition Name	Ratio	Ratio Error	Normalized Ratio	Normalized Ratio Error	Scaled Ratio	Scaled Ratio Error	Cq Mean	Cq Error	Sample Type	Sample Type RQ	Gene Type	Condition Type	Excluded	Dye	Failure	Replicate Group Members	Number
255;132;197;238	A1	DsRNA-NbHK NbHK 1d	None		-	-	-	-	-	-	28.27	0.48	Unknown	Unknown	Target	Unknown	Indeterminate	SYBR Green I	Checked	A1, [A2], A3	1
255;250;215;15	A4	DsRNA-NbHK NbHK 3d	None		-	-	-	-	-	-	25.55	0.16	Unknown	Unknown	Target	Unknown	Unchecked	SYBR Green I	Checked	A4, A5, A6	2
255;95;103;174	A7	DsRNA-NbHK NbHK 5d	None		-	-	-	-	-	-	24.36	0.28	Unknown	Unknown	Target	Unknown	Unchecked	SYBR Green I	Checked	A7, A8, A9	3
255;66;41;24	B1	DsRNA-NbHK NbSSU 1d	None		-	-	-	-	-	-	28.33	0.98	Unknown	Unknown	Target	Unknown	Indeterminate	SYBR Green I	Checked	B1, B2, [B3]	4
255;242;138;21	B4	DsRNA-NbHK NbSSU 3d	None		-	-	-	-	-	-	25.54	0.24	Unknown	Unknown	Target	Unknown	Unchecked	SYBR Green I	Checked	B4, B5, B6	5
255;180;73;149	B7	DsRNA-NbHK NbSSU 5d	None		-	-	-	-	-	-	24.92	0.32	Unknown	Unknown	Target	Unknown	Unchecked	SYBR Green I	Checked	B7, B8, B9	6
255;234;79;79	C1	DsRNA-EGFP NbHK 1d	None		-	-	-	-	-	-	28.07	0.23	Unknown	Unknown	Target	Unknown	Unchecked	SYBR Green I	Checked	C1, C2, C3	7
255;103;103;103	C4	DsRNA-EGFP NbHK 3d	None		-	-	-	-	-	-	24.39	0.35	Unknown	Unknown	Target	Unknown	Unchecked	SYBR Green I	Checked	C4, C5, C6	8
255;103;154;47	C7	DsRNA-EGFP NbHK 5d	None		-	-	-	-	-	-	24.88	0.18	Unknown	Unknown	Target	Unknown	Indeterminate	SYBR Green I	Checked	C7, [C8], C9	9
255;47;73;113	D1	DsRNA-EGFP NbSSU 1d	None		-	-	-	-	-	-	27.96	0.3	Unknown	Unknown	Target	Unknown	Unchecked	SYBR Green I	Checked	D1, D2, D3	10
255;132;197;238	D4	DsRNA-EGFP NbSSU 3d	None		-	-	-	-	-	-	25.45	0.15	Unknown	Unknown	Target	Unknown	Unchecked	SYBR Green I	Checked	D4, D5, D6	11
255;250;215;15	D7	DsRNA-EGFP NbSSU 5d	None		-	-	-	-	-	-	25.58	0.21	Unknown	Unknown	Target	Unknown	Unchecked	SYBR Green I	Checked	D7, D8, D9	12

## Sheet: Sheet2
Color	Replicate Group	Sample Name	Gene Name	Condition Name	Ratio	Ratio Error	Normalized Ratio	Normalized Ratio Error	Scaled Ratio	Scaled Ratio Error	Cq Mean	Cq Error	Sample Type	Sample Type RQ	Gene Type	Condition Type	Excluded	Dye	Failure	Replicate Group Members	Number
255;132;197;238	A1	DsRNA-NbHK NbHK 1d	None		-	-	-	-	-	-	28.9	0.34	Unknown	Unknown	Target	Unknown	Unchecked	SYBR Green I	Checked	A1, A2, A3	1
255;250;215;15	A4	DsRNA-NbHK NbHK 3d	None		-	-	-	-	-	-	25.77	0.16	Unknown	Unknown	Target	Unknown	Unchecked	SYBR Green I	Checked	A4, A5, A6	2
255;95;103;174	A7	DsRNA-NbHK NbHK 5d	None		-	-	-	-	-	-	25.15	0.31	Unknown	Unknown	Target	Unknown	Unchecked	SYBR Green I	Checked	A7, A8, A9	3
255;66;41;24	B1	DsRNA-NbHK NbSSU 1d	None		-	-	-	-	-	-	28.26	0.08	Unknown	Unknown	Target	Unknown	Indeterminate	SYBR Green I	Checked	B1, [B2], B3	4
255;242;138;21	B4	DsRNA-NbHK NbSSU 3d	None		-	-	-	-	-	-	25.57	0.15	Unknown	Unknown	Target	Unknown	Unchecked	SYBR Green I	Checked	B4, B5, B6	5
255;180;73;149	B7	DsRNA-NbHK NbSSU 5d	None		-	-	-	-	-	-	24.88	0.21	Unknown	Unknown	Target	Unknown	Unchecked	SYBR Green I	Checked	B7, B8, B9	6
255;234;79;79	C1	DsRNA-EGFP NbHK 1d	None		-	-	-	-	-	-	28.89	0.32	Unknown	Unknown	Target	Unknown	Indeterminate	SYBR Green I	Checked	[C1], C2, C3	7
255;103;103;103	C4	DsRNA-EGFP NbHK 3d	None		-	-	-	-	-	-	24.07	0.17	Unknown	Unknown	Target	Unknown	Unchecked	SYBR Green I	Checked	C4, C5, C6	8
255;103;154;47	C7	DsRNA-EGFP NbHK 5d	None		-	-	-	-	-	-	24.2	0.06	Unknown	Unknown	Target	Unknown	Indeterminate	SYBR Green I	Checked	C7, [C8], C9	9
255;47;73;113	D1	DsRNA-EGFP NbSSU 1d	None		-	-	-	-	-	-	28.18	0.34	Unknown	Unknown	Target	Unknown	Unchecked	SYBR Green I	Checked	D1, D2, D3	10
255;234;79;79	D4	DsRNA-EGFP NbSSU 3d	None		-	-	-	-	-	-	25.54	0.19	Unknown	Unknown	Target	Unknown	Unchecked	SYBR Green I	Checked	D4, D5, D6	11
255;250;215;15	D7	DsRNA-EGFP NbSSU 5d	None		-	-	-	-	-	-	24.28	0.22	Unknown	Unknown	Target	Unknown	Unchecked	SYBR Green I	Checked	D7, D8, D9	12

## Sheet: Sheet3
Color	Replicate Group	Sample Name	Gene Name	Condition Name	Ratio	Ratio Error	Normalized Ratio	Normalized Ratio Error	Scaled Ratio	Scaled Ratio Error	Cq Mean	Cq Error	Sample Type	Sample Type RQ	Gene Type	Condition Type	Excluded	Dye	Failure	Replicate Group Members	Number
255;132;197;238	A1	DsRNA-NbHK NbHK 1d	None		-	-	-	-	-	-	28.24	0.15	Unknown	Unknown	Target	Unknown	Unchecked	SYBR Green I	Checked	A1, A2, A3	1
255;250;215;15	A4	DsRNA-NbHK NbHK 3d	None		-	-	-	-	-	-	25.12	0.23	Unknown	Unknown	Target	Unknown	Indeterminate	SYBR Green I	Checked	A4, A5, [A6]	2
255;95;103;174	A7	DsRNA-NbHK NbHK 5d	None		-	-	-	-	-	-	24.16	0.18	Unknown	Unknown	Target	Unknown	Unchecked	SYBR Green I	Checked	A7, A8, A9	3
255;66;41;24	B1	DsRNA-NbHK NbSSU 1d	None		-	-	-	-	-	-	27.29	0.3	Unknown	Unknown	Target	Unknown	Unchecked	SYBR Green I	Checked	B1, B2, B3	4
255;66;41;24	B4	DsRNA-NbHK NbSSU 3d	None		-	-	-	-	-	-	24.75	0.18	Unknown	Unknown	Target	Unknown	Unchecked	SYBR Green I	Checked	B4, B5, B6	5
255;180;73;149	B7	DsRNA-NbHK NbSSU 5d	None		-	-	-	-	-	-	24.15	0.31	Unknown	Unknown	Target	Unknown	Unchecked	SYBR Green I	Checked	B7, B8, B9	6
255;234;79;79	C1	DsRNA-EGFP HK 1d	None		-	-	-	-	-	-	27.93	0.02	Unknown	Unknown	Target	Unknown	Indeterminate	SYBR Green I	Checked	[C1], C2, C3	7
255;103;103;103	C4	DsRNA-EGFP HK 3d	None		-	-	-	-	-	-	23.85	0.34	Unknown	Unknown	Target	Unknown	Unchecked	SYBR Green I	Checked	C4, C5, C6	8
255;103;154;47	C7	DsRNA-EGFP HK 5d	None		-	-	-	-	-	-	23.79	0.32	Unknown	Unknown	Target	Unknown	Unchecked	SYBR Green I	Checked	C7, C8, C9	9
255;47;73;113	D1	DsRNA-EGFP SSU 1d	None		-	-	-	-	-	-	26.89	0.08	Unknown	Unknown	Target	Unknown	Indeterminate	SYBR Green I	Checked	[D1], D2, D3	10
255;132;197;238	D4	DsRNA-EGFP SSU 3d	None		-	-	-	-	-	-	24.41	0.07	Unknown	Unknown	Target	Unknown	Unchecked	SYBR Green I	Checked	D4, D5, D6	11
255;250;215;15	D7	DsRNA-EGFP SSU 5d	None		-	-	-	-	-	-	24.01	0.13	Unknown	Unknown	Target	Unknown	Unchecked	SYBR Green I	Checked	D7, D8, D9	12
