# Supplementary material for: A secretory hexokinase plays an active role in the proliferation of Nosema bombycis
Source: PeerJ. 2018 Sep 21;6:e5658. doi: 10.7717/peerj.5658 (PMC6152459; doi:10.7717/peerj.5658)
Supplement: Table S4 — Real-time absolute quantitative PCR raw data of β -Nbtubulin copy number detection which include Cq and concentration (copy number) of β -Nbtubulin in blank, experimental and mock groups.Blank 1, 3, 5d mean Blank groups at 1, 3, 5 d. p. i . DsRNA-EGFP 1, 3, 5d mean control groups at 1, 3, 5 d. p. i. DsRNA-NbHK 1, 3, 5d mean experimental groups at 1, 3, 5 d. p. i. Standards were the standard samples which copy number had been known. [file peerj-06-5658-s010.xlsx]

## Sheet: Sheet1
Color	Replicate Group	Sample Name	Gene Name	Cq Mean	Cq Error	Concentration Mean	Concentration Error	Sample Type	Standard	Excluded	Dye	Number	Replicate Group Members	Failure
255;234;79;79	F4	3	None	27.74	0.67	1077	539.3	Standard	1125	Unchecked	SYBR Green I	16	F4, F5, F6	Unchecked
255;205;18;55	F1	4	None	24.4	0.11	10540	856.5	Standard	11250	Unchecked	SYBR Green I	15	F1, F2, F3	Unchecked
255;180;73;149	E10	5	None	20.84	0.05	130100	4742	Standard	112500	Unchecked	SYBR Green I	14	E10, E11, E12	Unchecked
255;242;138;21	E7	6	None	17.52	0.04	1348000	36280	Standard	1125000	Unchecked	SYBR Green I	13	E7, E8, E9	Unchecked
255;66;41;24	E4	7	None	14.4	0.02	12220000	148800	Standard	11250000	Unchecked	SYBR Green I	12	E4, E5, E6	Unchecked
255;34;176;146	E1	8	None	11.72	0	80990000	0	Standard	112500000	Indeterminate	SYBR Green I	11	E1, [E2], E3	Unchecked
255;132;197;238	A1	Blank 1d	None	22.22	0.12	49100	4021	Unknown	-	Unchecked	SYBR Green I	1	A1, A2, A3	Unchecked
255;250;215;15	A4	Blank 3d	None	20.16	0.04	197817	2984	Unknown	-	Unchecked	SYBR Green I	2	A4, A5, A6	Unchecked
255;95;103;174	A7	Blank 5d	None	19.03	0.03	421464	12670	Unknown	-	Unchecked	SYBR Green I	3	A7, A8, A9	Unchecked
255;66;41;24	B1	DsRNA-EGFP 1d	None	22.18	0.05	50410	1622	Unknown	-	Unchecked	SYBR Green I	5	B1, B2, B3	Unchecked
255;242;138;21	B4	DsRNA-EGFP 3d	None	19.95	0.05	229208	4026	Unknown	-	Unchecked	SYBR Green I	6	B4, B5, B6	Unchecked
255;180;73;149	B7	DsRNA-EGFP 5d	None	19.53	0	327100	0	Unknown	-	Unchecked	SYBR Green I	7	B7, B8, B9	Unchecked
255;234;79;79	C1	DsRNA-NbHK 1d	None	21.75	0.08	68490	3795	Unknown	-	Unchecked	SYBR Green I	8	C1, C2, C3	Unchecked
255;103;103;103	C4	DsRNA-NbHK 3d	None	21.51	0.04	80690	2282	Unknown	-	Unchecked	SYBR Green I	9	C4, C5, C6	Unchecked
255;103;103;103	C7	DsRNA-NbHK 5d	None	19.72	0.02	286000	3484	Unknown	-	Unchecked	SYBR Green I	10	C7, C8, C9	Unchecked

## Sheet: Sheet2
Color	Replicate Group	Sample Name	Gene Name	Cq Mean	Cq Error	Concentration Mean	Concentration Error	Sample Type	Standard	Excluded	Dye	Number	Replicate Group Members	Failure
255;234;79;79	F4	3	None	27.74	0.38	1094	270.1	Standard	1235	Unchecked	SYBR Green I	16	F4, F5, F6	Unchecked
255;205;18;55	F1	4	None	24.36	0.01	11670	82.49	Standard	12350	Unchecked	SYBR Green I	15	F1, F2, F3	Unchecked
255;180;73;149	E10	5	None	20.78	0.27	148100	28950	Standard	123500	Unchecked	SYBR Green I	14	E10, E11, E12	Unchecked
255;242;138;21	E7	6	None	17.54	0.12	1449000	124200	Standard	1235000	Unchecked	SYBR Green I	13	E7, E8, E9	Unchecked
255;66;41;24	E4	7	None	14.33	0.12	14020000	1184000	Standard	12350000	Unchecked	SYBR Green I	12	E4, E5, E6	Unchecked
255;34;176;146	E1	8	None	11.61	0.16	96560000	10870000	Standard	123500000	Unchecked	SYBR Green I	11	E1, E2, E3	Unchecked
255;132;197;238	A1	Blank 1d	None	22.18	0.02	54370	586.2	Unknown	-	Unchecked	SYBR Green I	1	A1, A2, A3	Unchecked
255;250;215;15	A4	Blank 3d	None	20.17	0.04	196435	2851	Unknown	-	Unchecked	SYBR Green I	2	A4, A5, A6	Unchecked
255;95;103;174	A7	Blank 5d	None	18.88	0.02	455281	6632	Unknown	-	Unchecked	SYBR Green I	3	A7, A8, A9	Unchecked
255;66;41;24	B1	DsRNA-EGFP 1d	None	22.09	0.17	58230	7260	Unknown	-	Unchecked	SYBR Green I	5	B1, B2, B3	Unchecked
255;242;138;21	B4	DsRNA-EGFP 3d	None	19.95	0.06	229208	5526	Unknown	-	Unchecked	SYBR Green I	6	B4, B5, B6	Unchecked
255;180;73;149	B7	DsRNA-EGFP 5d	None	19.54	0.01	351500	2877	Unknown	-	Unchecked	SYBR Green I	7	B7, B8, B9	Unchecked
255;234;79;79	C1	DsRNA-NbHK 1d	None	21.69	0.11	77040	6198	Unknown	-	Unchecked	SYBR Green I	8	C1, C2, C3	Unchecked
255;103;103;103	C4	DsRNA-NbHK 3d	None	21.45	0.15	91640	9675	Unknown	-	Unchecked	SYBR Green I	9	C4, C5, C6	Unchecked
255;103;154;47	C7	DsRNA-NbHK 5d	None	19.72	0.05	311100	10310	Unknown	-	Unchecked	SYBR Green I	10	C7, C8, C9	Unchecked

## Sheet: Sheet3
Color	Replicate Group	Sample Name	Gene Name	Cq Mean	Cq Error	Concentration Mean	Concentration Error	Sample Type	Standard	Excluded	Dye	Number	Replicate Group Members	Failure
255;234;79;79	F4	3	None	27.04	0.16	1232	139.7	Standard	1235	Indeterminate	SYBR Green I	16	[F4], F5, F6	Unchecked
255;205;18;55	F1	4	None	24.04	0.03	10970	201.3	Standard	12350	Unchecked	SYBR Green I	15	F1, F2, F3	Unchecked
255;180;73;149	E10	5	None	20.74	0.04	122600	3583	Standard	123500	Unchecked	SYBR Green I	14	E10, E11, E12	Unchecked
255;242;138;21	E7	6	None	17.38	0.08	1433000	82220	Standard	1235000	Unchecked	SYBR Green I	13	E7, E8, E9	Unchecked
255;66;41;24	E4	7	None	14.12	0.03	15420000	360000	Standard	12350000	Unchecked	SYBR Green I	12	E4, E5, E6	Unchecked
255;34;176;146	E1	8	None	11.6	0.03	97240000	2270000	Standard	123500000	Unchecked	SYBR Green I	11	E1, E2, E3	Unchecked
255;132;197;238	A1	Blank 1d	None	22.04	0.01	47290	400	Unknown	-	Unchecked	SYBR Green I	1	A1, A2, A3	Unchecked
255;95;103;174	A7	Blank 3d	None	21.75	0.03	58600	1128	Unknown	-	Unchecked	SYBR Green I	3	A7, A8, A9	Unchecked
255;250;215;15	A4	Blank 5d	None	19.37	0.04	269515	2904	Unknown	-	Unchecked	SYBR Green I	2	A4, A5, A6	Unchecked
255;66;41;24	B1	DsRNA-EGFP 1d	None	21.5	0.08	57100	3277	Unknown	-	Unchecked	SYBR Green I	5	B1, B2, B3	Unchecked
255;242;138;21	B4	DsRNA-EGFP 3d	None	20.81	0.09	116300	7113	Unknown	-	Unchecked	SYBR Green I	6	B4, B5, B6	Unchecked
255;180;73;149	B7	DsRNA-EGFP 5d	None	19.49	0.08	305900	18100	Unknown	-	Unchecked	SYBR Green I	7	B7, B8, B9	Unchecked
255;234;79;79	C1	DsRNA-NbHK 1d	None	21.24	0.01	85060	621.5	Unknown	-	Unchecked	SYBR Green I	8	C1, C2, C3	Unchecked
255;103;103;103	C4	DsRNA-NbHK 3d	None	24.52	0.11	7739	604.2	Unknown	-	Unchecked	SYBR Green I	9	C4, C5, C6	Unchecked
255;103;154;47	C7	DsRNA-NbHK 5d	None	19.64	0.01	273100	1151	Unknown	-	Unchecked	SYBR Green I	10	C7, C8, C9	Unchecked
